# Supplementary material
Source: Frontiers journal article supplement (https://www.frontiersin.org/articles/254792)
Supplement: Table_1.DOCX [file Table_1.DOCX]

**Supplementary table 1.** **SLA class I alleles and haplotypes in Göttingen minipigs (N=19).** Number of reads coding for SLA class I molecules are displayed and percentages of these are shown for each allele expressed by the *SLA-1*, *-2*, or *-3* loci as indicated. Novel sequences (NS) were placed in the SLA-1, -2, or -3 columns according to the phylogenetic analysis (supplementary figure 2 and data not shown). Data was obtained in NGS#1. SLA class I typing of pig #319871 and 319938 using the PCR-SSP method is included for comparison. Alleles in brackets appeared as weak bands when analysed by gel electrophoresis.

| **Animal ID** | **Reads** | ***SLA-1*** | **%** | ***SLA-3*** | **%** | ***SLA-2*** | **%** | **Haplotype** |
| --- | --- | --- | --- | --- | --- | --- | --- | --- |
| 319871 | 141546 | *SLA-1*an02* | 31.1 | *SLA-3*0304* | 1.5 | *SLA-2*an04* | 67.4 | Hp-X.0 |
| 319871  (PCR-SSP) |  | *SLA-1**08XX  *(SLA-1*11XX)* |  | *SLA-3**03XX *(SLA-3*0801)* |  | *SLA-2**an04  *(SLA-2*03XX)* |  | ? |
| 319938 | 140603 | *SLA-1*an02* | 18.0 | *SLA-3*0304* | 3.2 | *SLA-2*an04* | 42.7 | Hp-X.0 |
| *SLA-1*0804* | 25.2 | *SLA-3*0305* | 2.4 | *SLA-2*0603* | 8.4 | Hp-17.0 |
| 319938  (PCR-SSP) |  | *SLA-1**an02*/0501*  *SLA-1**08XX *(SLA-1*1501) (SLA-1*cs02) (SLA-1*11XX)* |  | *SLA-3**03XX  *(SLA-3*05XX)*  *(SLA-3*0801) (SLA-3*0601)* |  | *SLA-2**an04  *SLA-2**06XX  *(SLA-2*01XX)*  *(SLA-2*03XX) (SLA-2*w14yn01) (SLA-2*w13sm20) (SLA-2*1601)* |  | (Hp-17.0)  ? |
| 319751 | 169997 | *SLA-1*an02* | 19.8 | ND | - | *SLA-2*an04* | 80.2 | Hp-X.0 |
| 319774 | 99368 | *SLA-1*0804* | 94.9 | *SLA-3*0305* | 4.0 | *SLA-2*0603* | 1.1 | Hp-17.0 |
| 319861 | 79436 | *SLA-1*0804* | 18.7 | *SLA-3*0305* | 5.6 | *SLA-2*0603* | 13.1 | Hp-17.0 |
| *SLA-1*an02* | 17.4 | *SLA-3*0304* | 2.5 | *SLA-2*an04* | 42.8 | Hp-X.0 |
| 319883 | 126775 | *SLA-1*an02* | 20.6 | *SLA-3*0304* | 1.7 | *SLA-2*an04* | 42.0 | Hp-X.0 |
| *NS#3* | 12.5 | *SLA-3*0301* | 1.4 | *SLA-2*0301* | 21.7 | Hp-Z.0 |
| 319907 | 99752 | *SLA-1*an02* | 19.4 | *SLA-3*0304* | 1.3 | *SLA-2*an04* | 43.7 | Hp-X.0 |
| *SLA-1*0804* | 24.7 | *SLA-3*0305* | 1.5 | *SLA-2*0603* | 9.3 | Hp-17.0 |
| 319955 | 53471 | *SLA-1*an02* | 19.9 | *SLA-3*0304* | 1.7 | *SLA-2*an04* | 44.4 | Hp-X.0 |
| *NS#3* | 11.3 | *SLA-3*0301* | 1.1 | *SLA-2*0301* | 21.5 | Hp-Z.0 |
| 320026 | 165827 | *SLA-1*an02* | 31.6 | *SLA-3*0304* | 2.5 | *SLA-2*an04* | 65.9 | Hp-X.0 |
| 320067 | 103547 | *NS#3* | 17.0 | *SLA-3*0301* | 1.6 | *SLA-2*0301* | 22.2 | Hp-Z.0 |
| *SLA-1*an02* | 21.1 | *SLA-3*0304* | 2.6 | *SLA-2*an04* | 35.5 | Hp-X.0 |
| 320076 | 96282 | *NS#3* | 13.8 | *SLA-3*0301* | 0.2 | *SLA-2*0301* | 28.3 | Hp-Z.0 |
| *SLA-1* 0804* | 46.2 | *SLA-3*0305* | 4.1 | *SLA-2*0603* | 7.4 | Hp-17.0 |
| 320087 | 30977 | *NS#3* | 1.1 | ND | - | *SLA-2*0301* | 98.9 | Hp-Z.0 |
| 320103 | 53869 | *SLA-1* 0804* | 43.0 | *SLA-3*0305* | 0.8 | ND | - | Hp-17.0 |
| *SLA-1*an02* | 2.8 | ND | - | *SLA-2*an04* | 53.3 | Hp-X.0 |
| 320145 | 99665 | *SLA-1*an02* | 22.6 | *SLA-3*0304* | 1.3 | *SLA-2*an04* | 40.7 | Hp-X.0 |
| *SLA-1* 0804* | 32.4 | *SLA-3*0305* | 2.3 | *SLA-2*0603* | 0.8 | Hp-17.0 |
| 320288 | 106159 | *SLA-1*an02* | 23.1 | *SLA-3*0304* | 2.3 | *SLA-2*an04* | 41.2 | Hp-X.0 |
| *NS#3* | 12.2 | *SLA-3*0301* | 0.7 | *SLA-2*0301* | 20.5 | Hp-Z.0 |
| 320302 | 140051 | *SLA-1*an02* | 25.7 | *SLA-3*0304* | 1.7 | *SLA-2*an04* | 46.3 | Hp-X.0 |
| *NS#3* | 8.5 | ND | - | *SLA-2*0301* | 17.9 | Hp-Z.0 |
| 319818 | 117347 | *SLA-1*an02* | 33.8 | *SLA-3*0304* | 3.0 | *SLA-2*an04* | 63.2 | Hp-X.0 |
| 319838 | 21558 | *NS#3* | 0.8 | ND | - | *SLA-2*0301* | 99.2 | Hp-Z.0 |
| 319981 | 100831 | *SLA-1*an02* | 0.6 | ND | - | *SLA-2*an04* | 98.7 | Hp-X.0 |
| ND | - | ND | - | *SLA-2*0301* | 0.7 | ? |
