# Supplementary material
Source: Frontiers journal article supplement (https://www.frontiersin.org/articles/254792)
Supplement: Table_4.DOCX [file Table_4.DOCX]

**Supplementary table 4.** **SLA class I alleles Belgian pigs (N=30)**. Number of reads coding for SLA class I molecules are displayed and percentages of these are shown for each allele expressed by the *SLA-1*, *-2*, or *-3* loci as indicated. Novel sequences (NS) were placed in the SLA-1, -2, or -3 columns according to the phylogenetic analysis (Supplementary figure 2 and data not shown). SLA class I haplotypes are displayed in the right column. SLA class I typing of pig A1 and A3 using the PCR-SSP method is included for comparison. Pigs typed using both the long and the short amplicon are marked with *. In bold are the alleles detected with the long amplicon but not the short amplicon. Alleles detected with the short amplicon (NGS#1) but not found with the long amplicon (NGS#2) are marked with #.

| **Animal ID** | **Reads** | ***SLA-1*** | **%** | ***SLA-3*** | **%** | ***SLA-2*** | **%** | **Haplotype** |
| --- | --- | --- | --- | --- | --- | --- | --- | --- |
| A1* | 58557 | *SLA-1*0801* | 10.1 |  |  | ***SLA-2*0502*** | - | Hp-7.0 |
| *SLA-1*1201/12Lw01/ 12hy01*  *SLA-1*1301/0602* | 5.7  27.1 | ***SLA-3*0502*** |  | *NS#7* | 57.0 | Hp-M.0 |
| A1  PCR-SSP |  | *SLA-1**08XX  *SLA-1**12XX  *SLA-1**13XX/06XX |  | *SLA-3**05XX |  | *SLA-2**05XX |  | ? |
| A2 | 55468 | *NS#1* | 31,4 | NS#9 | 0.3 | *NS#2* | 56.4 | ? |
| *NS#4* | 11,4 | ND | - | NS#6 | 0,4 | ? |
| A3* | 71660 | *SLA-1*01rh28/ 0102/0101* | 9,6 | ND | - | **SLA-2*0101** | - | Hp-1a.0 |
| *SLA-1*0401/0402/04gx01* | 48,7 | *SLA-3*0503/0504* | 33.2 | *SLA-2*0801* | 8.5 | Hp-D.0 |
| A3  PCR-SSP |  | *SLA-1**01XX  *SLA-1**04XX  *SLA-1*1501* |  | *SLA-3**05XX  *SLA-3**01XX |  | *SLA-2**01XX *SLA-2**w08XX |  | ? |
| A4* | 111077 | *SLA-1*0401/0402/04gx01* | 32 | *SLA-3*0503/0504* | 25,9 | *SLA-2*0801* | 11.7 | Hp-D.0 |
| *SLA-1*1401* | 9.7 | *#SLA-3*04hb06* | 6,1 | *SLA-2*0602an07/ 060201* | 14.4 | Hp-62.0 |
| A5* | 51272 | *SLA-1*0201/0202/02we02*  *SLA-1*0701/0702* | 10.3  23.1 | ND | - | *SLA-2*0201* | 9.4 | Hp-2.0 |
| *SLA-1*gz12/1401* | 2.8 | *SLA-3*0502* | 35,2 | *SLA-2*1003* | 19.1 | Hp-A.0 |
| B1* | 36989 | *SLA-1*0201/0202/02we02*  *SLA-1*0701/0702* | 11,9  11,2 |  |  | *SLA-2*0201* | 12,4 | Hp-2.0 |
| *SLA-1*gz12/1401* | 13,8 | *#SLA-3*0502* | 7.0 | *SLA-2*1003* | 12,9 | Hp-A.0 |
| *#SLA-1*gz03/05ms05/0803* | 6,4 |  |  | *#NS#7* | 2.1 |  |
| *#SLA-1*1301/0602* | 6,7 |  |  | *#SLA-2*10sk21* | 4.0 |  |
| *#SLA-1*1201/12Lw01/ 12hy01* | 1.6 |  |  | *#SLA-2*110101* | 5.9 |  |
| *#SLA-1*08sk11* | 4.1 |  |  |  |  |  |
| B2* | 128335 | *SLA-1*gz12/1401* | 29.0 | *#SLA-3*0502* | 5,4 | *SLA-2*1003* | 14,6 | Hp-A.0 |
| *SLA-1*gz03/05ms05/0803* | 14.4 | *SLA-3*0601* | 4.3 | *SLA-2*1201/ 12Lw01* | 32.2 | Hp-B.0 |
| B3* | 92218 | *SLA-1*0401/0402/04gx01* | 21,0 | *SLA-3*0503/0504* | 5,8 | *SLA-2*0801* | 9.5 | Hp-D.0 |
| *SLA-1*1501/1502* | 34.5 | ***SLA-3*070102*** | - | *SLA-2*0503* | 29.2 | Hp-28.0 |
| B4 | 128229 | *SLA-1*08sk11* | 37,4 | *SLA-3*0502* | 18.8 | *SLA-2*10sk21* | 34.3 | Hp-E.0 |
| *SLA-1*1401* | 8,1 |  |  | *SLA-2*0602an07/ 060201* | 1 | Hp-62.0 |
|  | | | | *SLA-2*0202* | 0.4 | ? |
| B5* | 62007 | *#SLA-1*0801* | 24.1 | ND | - | *SLA-2*0502* | 27.6 | Hp-7.0 |
| *SLA-1*1201/12Lw01/12hy01*  *SLA-1*1301/0602* | 9,9  17.4 | *#SLA-3*0502* | 5,1 | *NS#7* | 15,8 | Hp-M.0 |
| C1* | 91956 | *SLA-1*0801* | 18.1 | ***SLA-3*070101***  ***/07Lw02*** | - | *SLA-2*0502* | 25,4 | Hp-7.0 |
| *SLA-1*1201/12Lw01/12hy01*  *SLA-1*1301/ 0602* | 9,8  20,7 | *SLA-3*0502* | 5,6 | NS#7 | 20,3 | Hp-M.0 |
| C2 | 87433 | *SLA-1*gz03/ 05ms05/0803* | 97.4 | ND | - | *SLA-2*1201/*  *12Lw01* | 0.3 | Hp-B.0 |
| *SLA-1*01rh28/ 0102/0101* | 2.3 | ND | - | ND | - | ? |
| C3* | 137656 | *SLA-1*0401/ 0402 /04gx01* | 25 | *SLA-3*0503/0504* | 5,1 | *SLA-2*0801* | 0,3 | Hp-D.0 |
| *#SLA-1*1501/1502* | 28,7 | ***SLA-3*070102*** | - | *SLA-2*0503* | 41.0 | Hp-28.0 |
| C4* | 144305 | *SLA-1*1401* | 22.0 | *SLA-3*04hb06* | 3.7 | *SLA-2*0602an07*  */060201* | 19.6 | Hp-62.0 |
| *SLA-1*gz12/1401* | 24,6 | *SLA-3*0502* | 12,6 | *SLA-2*1003* | 17.5 | Hp-A.0 |
| C5* | 112004 | *SLA-1*0201/02we02/0202*  *SLA-1*0701/0702* | 14.1  1.7 | ND | - | ***SLA-2*0201*** |  | Hp-2.0 |
| ***SLA-1*gz12/1401*** | - | *SLA-3*0502* | 0.8 | *SLA-2*1003* | 83.4 | Hp-A.0 |
| D1 | 67057 | *SLA-1*08sk11* | 28.0 | *SLA-3*0502* | 4.6 | *SLA-2*10sk21* | 35.7 | Hp-E.0 |
| *SLA-1*gz03/05ms05/0803* | 31.4 | ND | - | *SLA-2*1201/*  *12Lw01* | 0,3 | Hp-B.0 |
| D2 | 107353 | *SLA-1*0201/02we02/0202*  *SLA-1*0701/0702* | 23,1  14,3 | ND | - | *SLA-2*0201* | 5,2 | Hp-2.0 |
| *SLA-1*gz12/1401* | 4,6 | *SLA-3*0502* | 7,5 | *SLA-2*1003* | 45,2 | Hp-A.0 |
| D3* | 120281 | *SLA-1*0201/02we02/0202* | 13,1 | ***SLA-3*0101*** | - | *SLA-2*110101* | 19.3 | Hp-I.0 |
| *SLA-1*1201/12Lw01/ 12hy01*  *SLA-1*1301/0602*  *#SLA-1*sk13*  *#SLA-1*wy06* | 13,5  22.4  0.1  0.1 | *SLA-3*0502* | 2,4 | *#NS#7* | 28,9 | Hp-M.0 |
| D4* | 71314 | *SLA-1*01rh28/0102/0101* | 21,3 | ***SLA-3*0101*** | - | ***SLA-2*0101*** | - | Hp-1a.0 |
| *SLA-1*1401* | 76,0 |  |  | *SLA-2*0602an07*  */060201* | 2.7 | Hp-62.0 |
| D5 | 83036 | *SLA-1*0201/02we02/0202*  *SLA-1*0701/0702* | 3,9  0.5 |  |  | ND | - | Hp-2.0 |
| ND | - |  |  | *SLA-2*1003* | 95.6 | ? |
| E1* | 96025 | *SLA-1*0801* | 19,9 | ND | - | *SLA-2*0502* | 0.5 | Hp-7.0 |
| *SLA-1*1201/12Lw01/12hy01*  *SLA-1*1301/0602* | 8,6  29,5 | SLA-3*0502 | 0,3 | *NS#7* | 41.3 | Hp-M.0 |
| E2 | 72757 | *NS#1* | 20.0 | *NS#9* | 8.2 | *NS#6* | 32,0 | ? |
| *NS#4* | 19.6 | *SLA-3*03an04* | 3.8 | *NS#2* | 16,4 | ? |
| E3* | 62543 | *SLA-1*0801* | 20.5 | ***SLA-3*070101***  ***/07Lw02*** | - | *SLA-2*0502* | 4,0 | Hp-7.0 |
| *SLA-1*1201/12Lw01/12hy01*  *SLA-1*1301/0602* | 16,4  22,3 | SLA-3*0502 | 2.4 | *NS#7* | 34,4 | Hp-M.0 |
| E4* | 95291 | *SLA-1*1501/1502* | 44.3 | ***SLA-3*070102*** | - | *SLA-2*0503* | 46,1 | Hp-28.0 |
| NS#20 | 2.1 | ***SLA-3*04hb06*** | - | *NS#10* | 7.5 | Hp-J.0 |
| E5 | 100875 | ND | - | *SLA-3*0502* | 2.3 | *SLA-2*1003* | 82,3 | Hp-A.0 |
| *SLA-1*0702/0701* | 5.7 | ND | - | *SLA-2*0202* | 9,6 | Hp-K.0 |
| F1 | 134799 | *SLA-1*08sk11* | 41,2 | ND | - | *SLA-2*10sk21* | 40.2 | Hp-E.0 |
| *SLA-1*1201/12Lw01/12hy01*  *SLA-1*1301/0602* | 1,7  2.8 | *SLA-3*0502* | 1.1 | *NS#7* | 3.3 | Hp-M.0 |
| *SLA-1*0702/0701* | 2.1 | ND | - | *SLA-2*0202* | 3.9 | Hp-K.0 |
| *SLA-1*0201/02we02/0202* | 1,4 | ND | - | *SLA-2*110101* | 2.4 | Hp-I.0 |
| F2* | 53880 | *SLA-1*0201/02we02/0202* | 14.5 | ND | - | *SLA-2*110101* | 15.1 | Hp-I.0 |
| *SLA-1*1201/12Lw01/12hy01*  *SLA-1*1301/0602* | 12.8  13.2 | *#SLA-3*0502* | 5.4 | *NS#7* | 19.7 | Hp-M.0 |
| *#SLA-1*sk13* | 19.2 | *#SLA-3*0101/ 01ev04/01rh12* | 0.1 | ***SLA-2*0202/02we02*** | - | ? |
| F3 | 80700 | *SLA-1*gz12/1401* | 28.3 | *SLA-3*0502* | 4.0 | *SLA-2*1003* | 20.0 | Hp-A.0 |
| *SLA-1*gz03/05ms05/0803* | 15.4 | *SLA-3*0601* | 3.0 | *SLA-2*1201/ 12Lw01* | 29.3 | Hp-B.0 |
| F5* | 103587 | *SLA-1*0401/0402/04gx01* | 54.7 | *SLA-3*0503/0504* | 41.3 | *SLA-2*0801* | 1.0 | Hp-D.0 |
| *SLA-1*0101/0102/01rh28* | 3.0 | ***SLA-3*0101*** | - | ***SLA-2*0101*** | - | Hp-1a.0 |
